# Supplementary material
Source: Springer Nature journal article supplement (https://www.springermedizin.de/resource/supplementary/12967_2007_216_MOESM5_ESM.pdf/9575964)

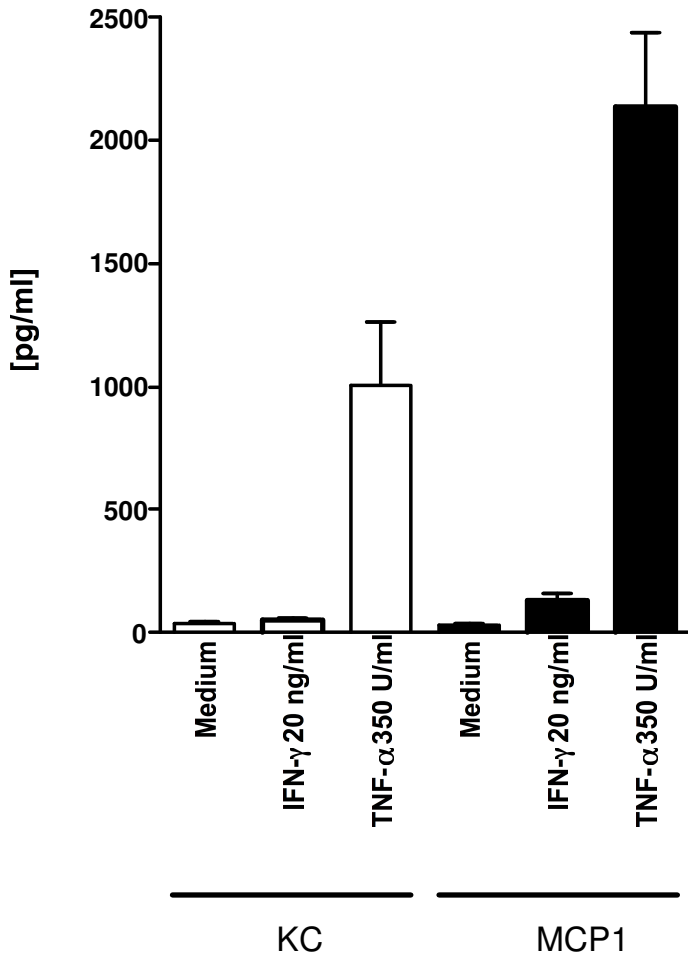

Supplement: MOESM5 [file 9575964]
